# Supplementary material for: Parametric study on the decarbonization potential of structural system and concrete mix design choices for mid-rise concrete buildings
Source: Research Square preprint supplement (doi:10.21203/rs.3.rs-3770660/v1), 2024-01-23
Supplement: Supplementary file 1 [file 34d84599aa57ca4f888c531c.docx]

**Supplementary information for the paper titled:**

**Parametric study on the decarbonization potential of structural system and concrete mix design choices for mid-rise concrete buildings**

Hisham Hafeza*, Petar Bajićb, Stanislav Aidarovc, Xhemsi Malijad, Michal Drewnioka, Phil Purnella,Nikola Tošićb

*a School of Civil Engineering, University of Leeds, Leeds LS2 9JT, United Kingdom.*

b*Universitat Politècnica de Catalunya – BarcelonaTech (UPC), Civil and Environmental Engineering Department, Jordi Girona 1–3, 08034 Barcelona, Spain*

c*Universitat Politècnica de Catalunya – BarcelonaTech (UPC), Project and Construction Engineering Department, Av. Diagonal 647, 08028 Barcelona, Spain*

d *Structural Concrete Laboratory, IBETON, ENAC, EPFL CH-1015 Lausanne, Switzerland*


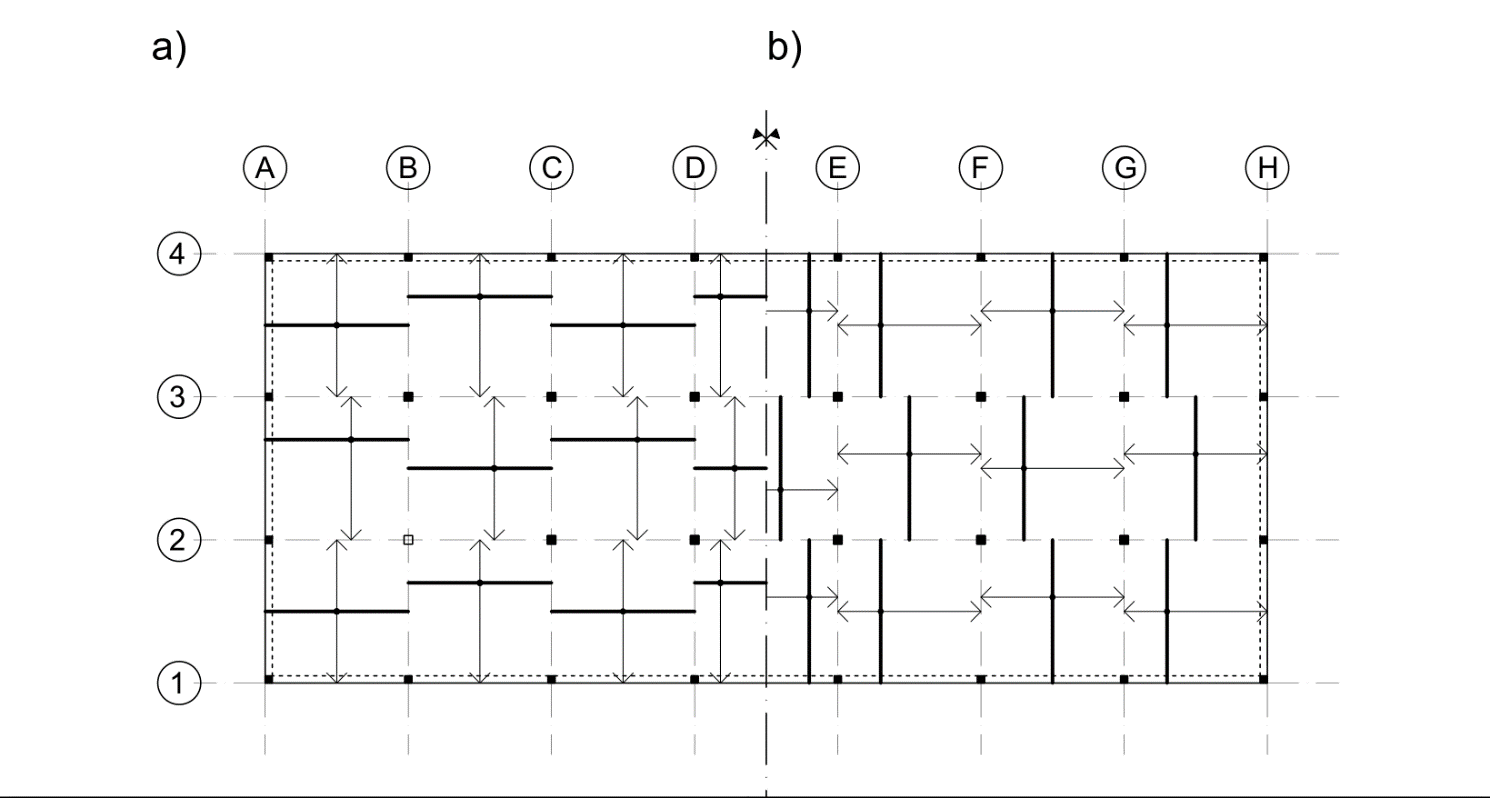


*Figure SF - 1: Flexural reinforcement layout a) YLM bottom zone X direction; b) YLM bottom zone X direction*


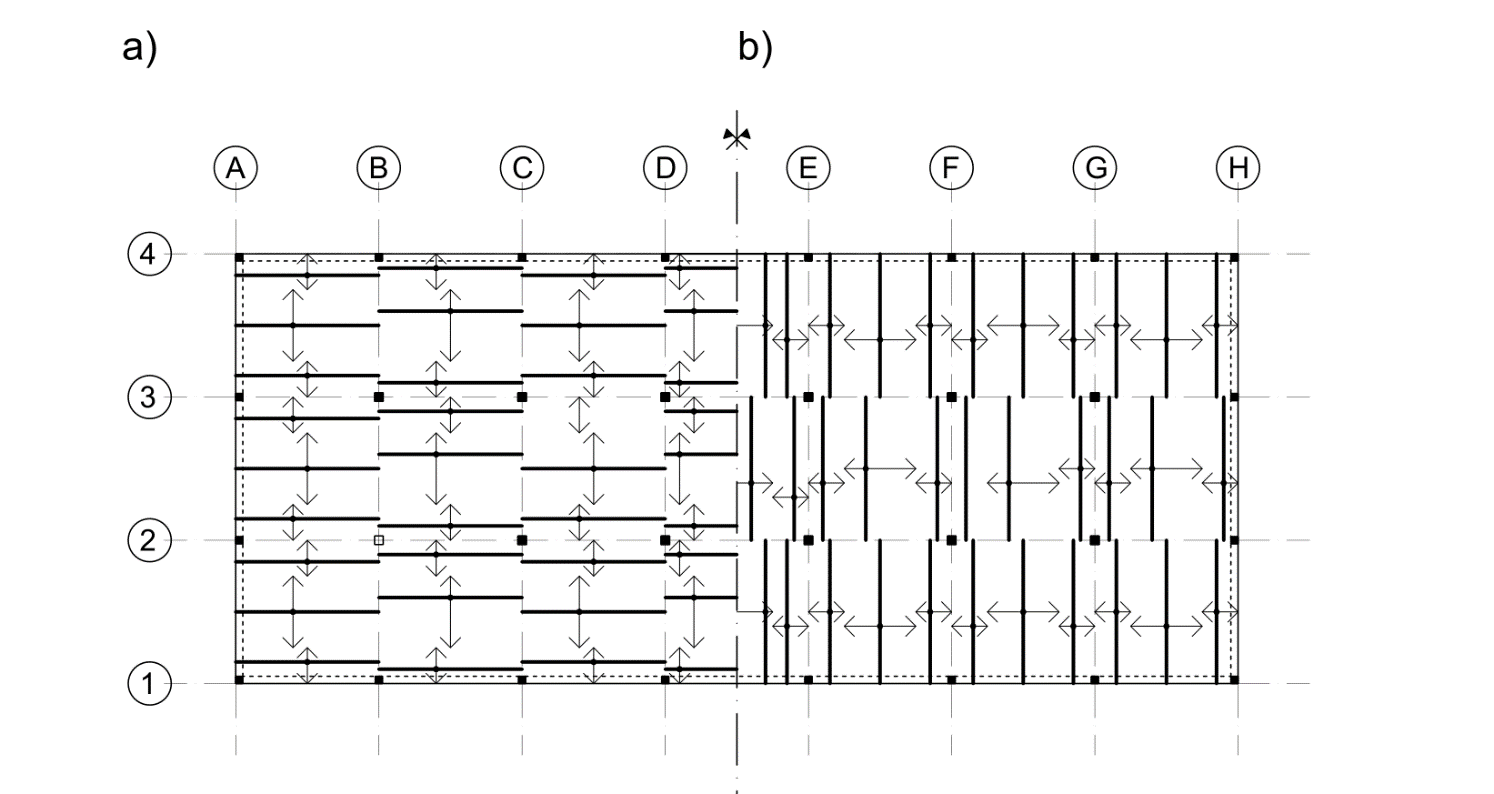


*Figure SF - 2: Flexural reinforcement layout; a) optimized LEFEA X direction; b) optimized LEFEA Y direction*


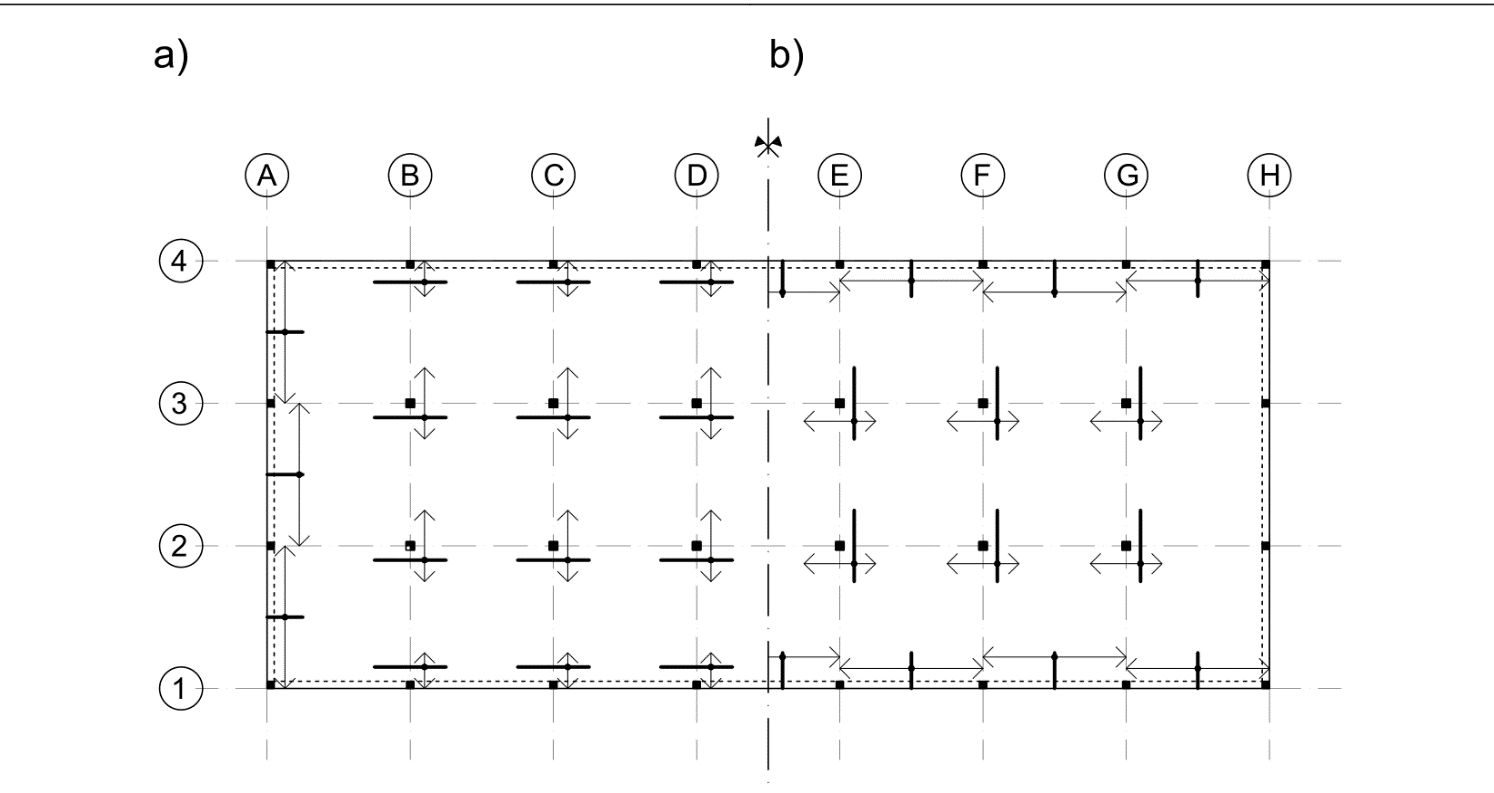


*Figure SF -3: Flexural reinforcement layout a) top zone X direction; b) top zone Y direction*


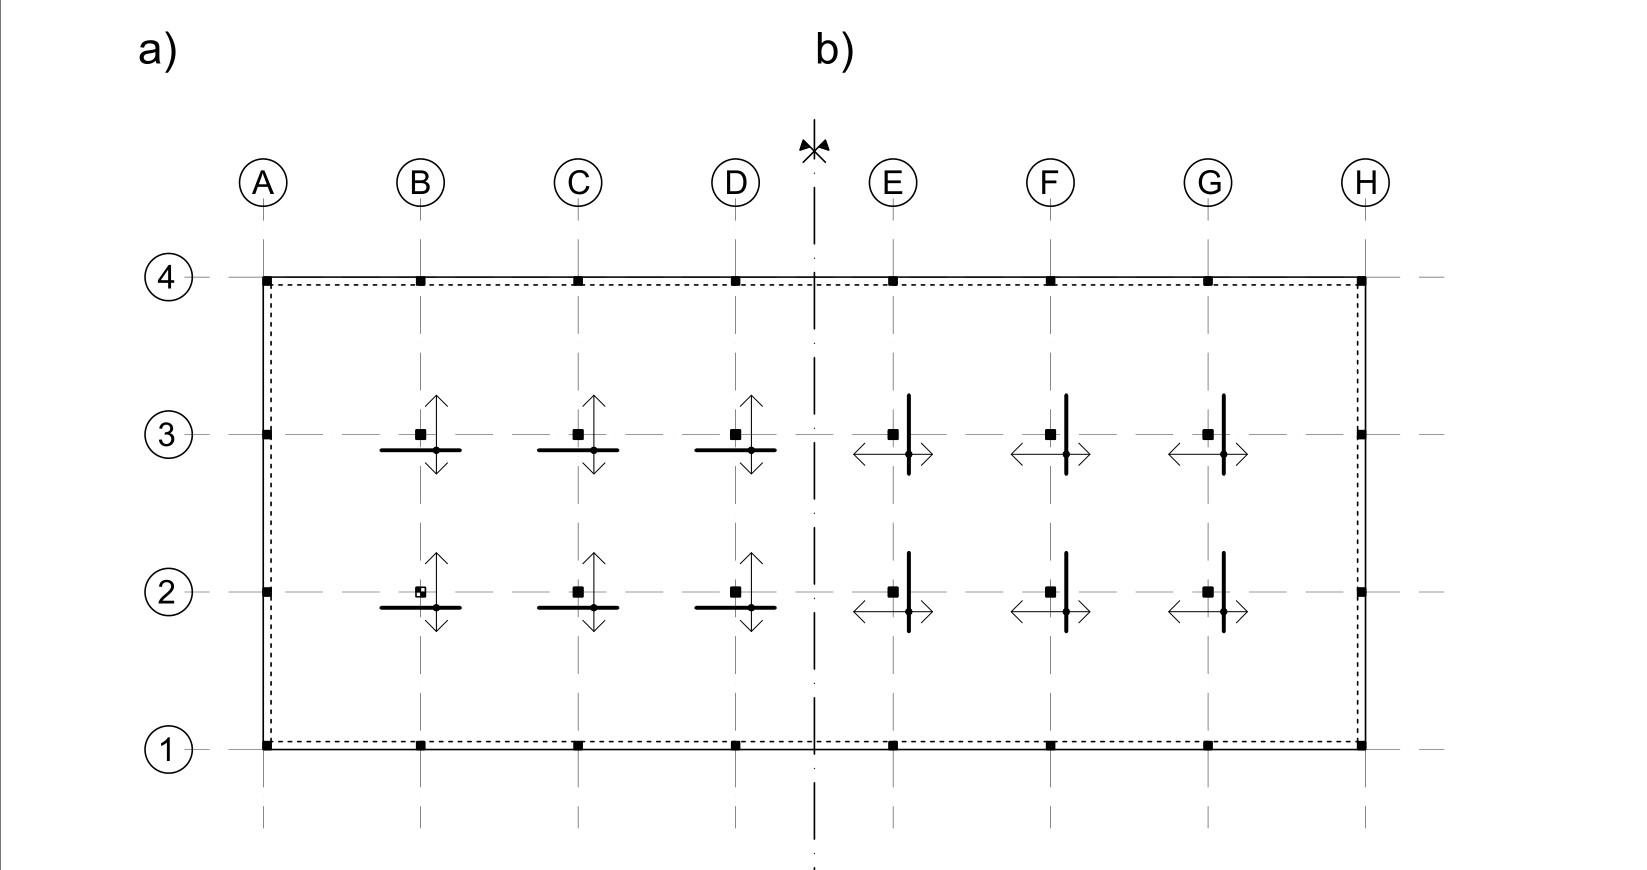


*Figure SF -4: Flexural reinforcement layout a) additional for punching X direction; b) additional for punching Y direction*

*Table ST-1: Material quantities for alternatives considered in this study*

| System: Flat slab | | Span: 5.0 m × 5.0 m | | | Number of stories: 5 | |
| --- | --- | --- | --- | --- | --- | --- |
| Structural element | Concrete volume [m3] | | Reinforcement YLM [t] | Reinforcement optimized LEFEA [t] | | Reinforcement unoptimized LEFEA [t] |
| Foundation slab C30/37  400 mm | 273.60 | | N/A | 22.57 | | N/A |
| Story slab C30/37  180 mm | 94.50 | | 5.92 | 6.35 | | 6.71 |
| Beam C30/37 | 10.00 | | N/A | 0.47 | | N/A |
| Columns C30/37 | 76.90 | | N/A | 3.20 | | N/A |
| Foundation slab C30/37  400 mm | 273.60 | | N/A | 22.57 | | N/A |
| Story slab C30/37  180 mm | 94.50 | | 5.92 | 6.35 | | 6.71 |
| Beam C30/37 | 10.00 | | N/A | 0.47 | | N/A |
| Columns C50/60 | 76.90 | | N/A | 3.14 | | N/A |
| Foundation slab C50/60  350 mm | 239.40 | | N/A | 23.96 | | N/A |
| Story slab C50/60  160 mm | 84.00 | | 6.30 | 7.06 | | 7.30 |
| Beam C50/60 | 7.50 | | N/A | 0.49 | | N/A |
| Columns C50/60 | 60.58 | | N/A | 2.84 | | N/A |
| Foundation slab C50/60  350 mm | 239.40 | | N/A | 23.96 | | N/A |
| Story slab C50/60  160 mm | 84.00 | | 6.30 | 7.06 | | 7.30 |
| Beam C50/60 | 7.50 | | N/A | 0.49 | | N/A |
| Columns C70/85 | 60.58 | | N/A | 2.68 | | N/A |
| Foundation slab C70/85  350 mm | 239.40 | | N/A | 24.83 | | N/A |
| Story slab C70/85  160 mm | 84.00 | | 6.37 | 7.22 | | 7.46 |
| Beam C70/85 | 7.50 | | N/A | 0.53 | | N/A |
| Columns C70/85 | 50.90 | | N/A | 2.40 | | N/A |
| System: Flat slab | | Span: 5.0 m × 5.0 m | | | Number of stories: 10 | |
| Structural element | Concrete volume [m3] | | Reinforcement YLM [t] | Reinforcement optimized LEFEA [t] | | Reinforcement unoptimized LEFEA [t] |
| Foundation slab C30/37  700 mm | 560.00 | | N/A | 40.23 | | N/A |
| Story slab C30/37  180 mm | 94.50 | | 5.92 | 6.35 | | 6.71 |
| Beam C30/37 | 10.00 | | N/A | 0.47 | | N/A |
| Columns C30/37 | 158.02 | | N/A | 7.78 | | N/A |
| Foundation slab C30/37  700 mm | 560.00 | | N/A | 40.23 | | N/A |
| Story slab C30/37  180 mm | 94.50 | | 5.92 | 6.35 | | 6.71 |
| Beam C30/37 | 10.00 | | N/A | 0.47 | | N/A |
| Columns C50/60 | 138.35 | | N/A | 6.47 | | N/A |
| Foundation slab C50/60  550 mm | 440.00 | | N/A | 43.88 | | N/A |
| Story slab C50/60  160 mm | 84.00 | | 6.30 | 7.06 | | 7.30 |
| Beam C50/60 | 7.50 | | N/A | 0.49 | | N/A |
| Columns C50/60 | 108.68 | | N/A | 6.47 | | N/A |
| Foundation slab C50/60  550 mm | 440.00 | | N/A | 43.88 | | N/A |
| Story slab C50/60  160 mm | 84.00 | | 6.30 | 7.06 | | 7.30 |
| Beam C50/60 | 7.50 | | N/A | 0.49 | | N/A |
| Columns C70/85 | 108.68 | | N/A | 6.11 | | N/A |
| Foundation slab C70/85  500 mm | 400.00 | | N/A | 41.14 | | N/A |
| Story slab C70/85  160 mm | 84.00 | | 6.37 | 7.23 | | 7.46 |
| Beam C70/85 | 7.50 | | N/A | 0.53 | | N/A |
| Columns C70/85 | 102.60 | | N/A | 6.07 | | N/A |
| System: Slab on beams | | Span: 5.0 m × 5.0 m | | | Number of stories: 5 | |
| Structural element | Concrete volume [m3] | | Reinforcement YLM [t] | Reinforcement optimized LEFEA [t] | | Reinforcement unoptimized LEFEA [t] |
| Foundation slab C30/37  400 mm | 273.60 | | N/A | 21.38 | | N/A |
| Story slab C30/37  160 mm | 84.00 | | 4.70 | 5.36 | | 5.62 |
| Beam C30/37 | 16.25 | | N/A | 1.51 | | N/A |
| Columns C30/37 | 50.44 | | N/A | 3.16 | | N/A |
| Foundation slab C30/37  400 mm | 273.60 | | N/A | 21.38 | | N/A |
| Story slab C30/37  160 mm | 84.00 | | 4.70 | 5.36 | | 5.62 |
| Beam C30/37 | 16.25 | | N/A | 1.51 | | N/A |
| Columns C50/60 | 45.08 | | N/A | 2.66 | | N/A |
| Foundation slab C50/60  350 mm | 239.40 | | N/A | 24.33 | | N/A |
| Story slab C50/60  160 mm | 84.00 | | 5.02 | 5.87 | | 6.00 |
| Beam C50/60 | 16.25 | | N/A | 1.63 | | N/A |
| Columns C50/60 | 43.36 | | N/A | 2.64 | | N/A |
| Foundation slab C50/60  350 mm | 239.40 | | N/A | 24.33 | | N/A |
| Story slab C50/60  160 mm | 84.00 | | 5.02 | 5.87 | | 6.00 |
| Beam C50/60 | 16.25 | | N/A | 1.63 | | N/A |
| Columns C70/85 | 43.36 | | N/A | 2.42 | | N/A |
| Foundation slab C70/85  350 mm | 239.40 | | N/A | 24.30 | | N/A |
| Story slab C70/85  160 mm | 84.00 | | 5.50 | 6.19 | | 6.31 |
| Beam C70/85 | 16.25 | | N/A | 1.75 | | N/A |
| Columns C70/85 | 40.07 | | N/A | 2.39 | | N/A |
| System: Slab on beams | | Span: 5.0 m × 5.0 m | | | Number of stories: 10 | |
| Structural element | Concrete volume [m3] | | Reinforcement YLM [t] | Reinforcement optimized LEFEA [t] | | Reinforcement unoptimized LEFEA [t] |
| Foundation slab C30/37  600 mm | 480.00 | | N/A | 36.65 | | N/A |
| Story slab C30/37  160 mm | 84.00 | | 4.70 | 5.36 | | 5.62 |
| Beam C30/37 | 16.25 | | N/A | 1.51 | | N/A |
| Columns C30/37 | 101.76 | | N/A | 11.62 | | N/A |
| Foundation slab C30/37  600 mm | 480.00 | | N/A | 36.65 | | N/A |
| Story slab C30/37  160 mm | 84.00 | | 4.70 | 5.36 | | 5.62 |
| Beam C30/37 | 16.25 | | N/A | 1.51 | | N/A |
| Columns C50/60 | 84.53 | | N/A | 7.94 | | N/A |
| Foundation slab C50/60  500 mm | 400.00 | | N/A | 40.95 | | N/A |
| Story slab C50/60  160 mm | 84.00 | | 5.02 | 5.87 | | 6.00 |
| Beam C50/60 | 16.25 | | N/A | 1.63 | | N/A |
| Columns C50/60 | 84.53 | | N/A | 8.02 | | N/A |
| Foundation slab C50/60  500 mm | 400.00 | | N/A | 40.95 | | N/A |
| Story slab C50/60  160 mm | 84.00 | | 5.02 | 5.87 | | 6.00 |
| Beam C50/60 | 16.25 | | N/A | 1.63 | | N/A |
| Columns C70/85 | 84.53 | | N/A | 6.39 | | N/A |
| Foundation slab C70/85  450 mm | 360.00 | | N/A | 41.70 | | N/A |
| Story slab C70/85  160 mm | 84.00 | | 5.50 | 6.19 | | 6.31 |
| Beam C70/85 | 16.25 | | N/A | 1.75 | | N/A |
| Columns C70/85 | 83.30 | | N/A | 6.24 | | N/A |
| System: Waffle slab | | Span: 5.0 m × 5.0 m | | | Number of stories: 5 | |
| Structural element | Concrete volume [m3] | | Reinforcement YLM [t] | Reinforcement optimized LEFEA [t] | | Reinforcement unoptimized LEFEA [t] |
| Foundation slab C30/37  350 mm | 239.40 | | N/A | 20.53 | | N/A |
| Story slab C30/37  160 + 75 mm* | 78.74 | | N/A | 6.09 | | N/A |
| Beam C30/37 | N/A | | N/A | N/A | | N/A |
| Columns C30/37 | 50.48 | | N/A | 5.00 | | N/A |
| Foundation slab C30/37  350 mm | 239.40 | | N/A | 20.53 | | N/A |
| Story slab C30/37  160 + 75 mm* | 78.74 | | N/A | 6.09 | | N/A |
| Beam C30/37 | N/A | | N/A | N/A | | N/A |
| Columns C50/60 | 37.60 | | N/A | 3.69 | | N/A |
| Foundation slab C50/60  350 mm | 239.40 | | N/A | 22.96 | | N/A |
| Story slab C50/60  160 + 75 mm* | 78.74 | | N/A | 5.99 | | N/A |
| Beam C50/60 | N/A | | N/A | N/A | | N/A |
| Columns C50/60 | 37.22 | | N/A | 3.69 | | N/A |
| Foundation slab C50/60  350 mm | 239.40 | | N/A | 22.96 | | N/A |
| Story slab C50/60  160 + 75 mm* | 78.74 | | N/A | 5.99 | | N/A |
| Beam C50/60 | N/A | | N/A | N/A | | N/A |
| Columns C70/85 | 35.28 | | N/A | 3.50 | | N/A |
| Foundation slab C70/85  350 mm | 239.40 | | N/A | 23.89 | | N/A |
| Story slab C70/85  160 + 75 mm* | 78.74 | | N/A | 5.99 | | N/A |
| Beam C70/85 | N/A | | N/A | N/A | | N/A |
| Columns C70/85 | 35.28 | | N/A | 3.50 | | N/A |
| System: Waffle slab | | Span: 5.0 m × 5.0 m | | | Number of stories: 10 | |
| Structural element | Concrete volume [m3] | | Reinforcement YLM [t] | Reinforcement optimized LEFEA [t] | | Reinforcement unoptimized LEFEA [t] |
| Foundation slab C30/37  500 mm | 400.00 | | N/A | 34.16 | | N/A |
| Story slab C30/37  160 + 75 mm* | 78.74 | | N/A | 6.09 | | N/A |
| Beam C30/37 | N/A | | N/A | N/A | | N/A |
| Columns C30/37 | 111.08 | | N/A | 11.01 | | N/A |
| Foundation slab C30/37  500 mm | 400.00 | | N/A | 34.16 | | N/A |
| Story slab C30/37  160 + 75 mm* | 78.74 | | N/A | 6.09 | | N/A |
| Beam C30/37 | N/A | | N/A | N/A | | N/A |
| Columns C50/60 | 84.15 | | N/A | 8.34 | | N/A |
| Foundation slab C50/60  450 mm | 360.00 | | N/A | 38.32 | | N/A |
| Story slab C50/60  160 + 75 mm* | 78.74 | | N/A | 6.01 | | N/A |
| Beam C50/60 | N/A | | N/A | N/A | | N/A |
| Columns C50/60 | 84.15 | | N/A | 8.34 | | N/A |
| Foundation slab C50/60  450 mm | 360.00 | | N/A | 38.32 | | N/A |
| Story slab C50/60  160 + 75 mm* | 78.74 | | N/A | 6.01 | | N/A |
| Beam C50/60 | N/A | | N/A | N/A | | N/A |
| Columns C70/85 | 71.83 | | N/A | 7.12 | | N/A |
| Foundation slab C70/85  450 mm | 360.00 | | N/A | 38.23 | | N/A |
| Story slab C70/85  160 + 75 mm* | 78.74 | | N/A | 6.02 | | N/A |
| Beam C70/85 | N/A | | N/A | N/A | | N/A |
| Columns C70/85 | 71.83 | | N/A | 7.12 | | N/A |
| System: Flat slab | | Span: 7.0 m × 7.5 m | | | Number of stories: 5 | |
| Structural element | Concrete volume [m3] | | Reinforcement YLM [t] | Reinforcement optimized LEFEA [t] | | Reinforcement unoptimized LEFEA [t] |
| Foundation slab C30/37  650 mm | 520.00 | | N/A | 41.58 | | N/A |
| Story slab C30/37  220 mm | 126.00 | | 11.34 | 10.61 | | 11.57 |
| Beam C30/37 | 12.50 | | N/A | 0.90 | | N/A |
| Columns C30/37 | 49.87 | | N/A | 3.67 | | N/A |
| Foundation slab C30/37  650 mm | 520.00 | | N/A | 41.58 | | N/A |
| Story slab C30/37  220 mm | 126.00 | | 11.34 | 10.61 | | 11.57 |
| Beam C30/37 | 12.50 | | N/A | 0.90 | | N/A |
| Columns C50/60 | 49.87 | | N/A | 2.42 | | N/A |
| Foundation slab C50/60  550 mm | 440.00 | | N/A | 41.80 | | N/A |
| Story slab C50/60  200 mm | 105.00 | | 11.60 | 10.44 | | 11.73 |
| Beam C50/60 | 12.50 | | N/A | 0.94 | | N/A |
| Columns C50/60 | 35.86 | | N/A | 2.74 | | N/A |
| Foundation slab C50/60  550 mm | 440.00 | | N/A | 41.80 | | N/A |
| Story slab C50/60  200 mm | 105.00 | | 11.60 | 10.44 | | 11.73 |
| Beam C50/60 | 12.50 | | N/A | 0.94 | | N/A |
| Columns C70/85 | 34.97 | | N/A | 2.59 | | N/A |
| Foundation slab C70/85  500 mm | 400.00 | | N/A | 41.76 | | N/A |
| Story slab C70/85  200 mm | 105.00 | | 11.44 | 11.72 | | 12.65 |
| Beam C70/85 | 10.00 | | N/A | 1.02 | | N/A |
| Columns C70/85 | 34.42 | | N/A | 2.34 | | N/A |
| System: Flat slab | | Span: 7.0 m × 7.5 m | | | Number of stories: 10 | |
| Structural element | Concrete volume [m3] | | Reinforcement YLM [t] | Reinforcement optimized LEFEA [t] | | Reinforcement unoptimized LEFEA [t] |
| Foundation slab C30/37  1000 mm | 800.00 | | N/A | 60.78 | | N/A |
| Story slab C30/37  220 mm | 126.00 | | 11.34 | 10.61 | | 11.57 |
| Beam C30/37 | 12.50 | | N/A | 0.90 | | N/A |
| Columns C30/37 | 101.76 | | N/A | 14.44 | | N/A |
| Foundation slab C30/37  650 mm | 800.00 | | N/A | 60.78 | | N/A |
| Story slab C30/37  220 mm | 126.00 | | 11.34 | 10.61 | | 11.57 |
| Beam C30/37 | 12.50 | | N/A | 0.90 | | N/A |
| Columns C50/60 | 92.33 | | N/A | 6.00 | | N/A |
| Foundation slab C50/60  800 mm | 640.00 | | N/A | 64.69 | | N/A |
| Story slab C50/60  200 mm | 105.00 | | 11.60 | 10.44 | | 11.73 |
| Beam C50/60 | 12.50 | | N/A | 0.94 | | N/A |
| Columns C50/60 | 76.91 | | N/A | 7.26 | | N/A |
| Foundation slab C50/60  550 mm | 640.00 | | N/A | 64.69 | | N/A |
| Story slab C50/60  200 mm | 105.00 | | 11.60 | 10.44 | | 11.73 |
| Beam C50/60 | 12.50 | | N/A | 0.94 | | N/A |
| Columns C70/85 | 71.45 | | N/A | 6.26 | | N/A |
| Foundation slab C70/85  750 mm | 600.00 | | N/A | 66.07 | | N/A |
| Story slab C70/85  200 mm | 105.00 | | 11.44 | 11.72 | | 12.65 |
| Beam C70/85 | 10.00 | | N/A | 1.02 | | N/A |
| Columns C70/85 | 70.20 | | N/A | 6.21 | | N/A |
| System: Slab on beams | | Span: 7.0 m × 7.5 m | | | Number of stories: 5 | |
| Structural element | Concrete volume [m3] | | Reinforcement YLM [t] | Reinforcement optimized LEFEA [t] | | Reinforcement unoptimized LEFEA [t] |
| Foundation slab C30/37  650 mm | 520.00 | | N/A | 38.34 | | N/A |
| Story slab C30/37  220 mm | 115.50 | | 7.72 | 7.37 | | 8.91 |
| Beam C30/37 | 19.50 | | N/A | 2.13 | | N/A |
| Columns C30/37 | 41.11 | | N/A | 5.05 | | N/A |
| Foundation slab C30/37  600 mm | 520.00 | | N/A | 38.34 | | N/A |
| Story slab C30/37  160 mm | 115.50 | | 7.72 | 7.37 | | 8.91 |
| Beam C30/37 | 19.50 | | N/A | 2.13 | | N/A |
| Columns C50/60 | 32.42 | | N/A | 3.40 | | N/A |
| Foundation slab C50/60  550 mm | 440.00 | | N/A | 41.11 | | N/A |
| Story slab C50/60  180 mm | 94.50 | | 9.02 | 9.38 | | 9.73 |
| Beam C50/60 | 17.06 | | N/A | 2.50 | | N/A |
| Columns C50/60 | 33.67 | | N/A | 2.74 | | N/A |
| Foundation slab C50/60  500 mm | 440.00 | | N/A | 41.11 | | N/A |
| Story slab C50/60  160 mm | 94.50 | | 9.02 | 9.38 | | 9.73 |
| Beam C50/60 | 17.06 | | N/A | 2.50 | | N/A |
| Columns C70/85 | 28.15 | | N/A | 2.72 | | N/A |
| Foundation slab C70/85  500 mm | 400.00 | | N/A | 37.58 | | N/A |
| Story slab C70/85  160 mm | 84.00 | | 9.10 | 9.27 | | 9.48 |
| Beam C70/85 | 17.06 | | N/A | 2.84 | | N/A |
| Columns C70/85 | 27.63 | | N/A | 3.19 | | N/A |
| System: Slab on beams | | Span: 7.0 m × 7.5 m | | | Number of stories: 10 | |
| Structural element | Concrete volume [m3] | | Reinforcement YLM [t] | Reinforcement optimized LEFEA [t] | | Reinforcement unoptimized LEFEA [t] |
| Foundation slab C30/37  900 mm | 720.00 | | N/A | 58.87 | | N/A |
| Story slab C30/37  220 mm | 115.50 | | 7.72 | 7.37 | | 8.91 |
| Beam C30/37 | 19.50 | | N/A | 2.13 | | N/A |
| Columns C30/37 | 81.72 | | N/A | 14.50 | | N/A |
| Foundation slab C30/37  600 mm | 720.00 | | N/A | 58.87 | | N/A |
| Story slab C30/37  160 mm | 115.50 | | 7.72 | 7.37 | | 8.91 |
| Beam C30/37 | 19.50 | | N/A | 2.13 | | N/A |
| Columns C50/60 | 81.72 | | N/A | 7.15 | | N/A |
| Foundation slab C50/60  750 mm | 600.00 | | N/A | 61.62 | | N/A |
| Story slab C50/60  180 mm | 94.50 | | 9.02 | 9.38 | | 9.73 |
| Beam C50/60 | 17.06 | | N/A | 2.50 | | N/A |
| Columns C50/60 | 75.50 | | N/A | 6.54 | | N/A |
| Foundation slab C50/60  500 mm | 600.00 | | N/A | 61.62 | | N/A |
| Story slab C50/60  160 mm | 94.50 | | 9.02 | 9.38 | | 9.73 |
| Beam C50/60 | 17.06 | | N/A | 2.50 | | N/A |
| Columns C70/85 | 70.01 | | N/A | 6.09 | | N/A |
| Foundation slab C70/85  700 mm | 560.00 | | N/A | 60.80 | | N/A |
| Story slab C70/85  160 mm | 84.00 | | 9.10 | 9.27 | | 9.48 |
| Beam C70/85 | 17.06 | | N/A | 2.84 | | N/A |
| Columns C70/85 | 66.51 | | N/A | 6.0211. | | N/A |
| System: Waffle slab | | Span: 7.0 m × 7.5 m | | | Number of stories: 5 | |
| Structural element | Concrete volume [m3] | | Reinforcement YLM [t] | Reinforcement optimized LEFEA [t] | | Reinforcement unoptimized LEFEA [t] |
| Foundation slab C30/37  550 mm | 440.00 | | N/A | 32.25 | | N/A |
| Story slab C30/37  200 + 75 mm* | 87.96 | | N/A | 9.91 | | N/A |
| Beam C30/37 | N/A | | N/A | N/A | | N/A |
| Columns C30/37 | 35.09 | | N/A | 3.48 | | N/A |
| Foundation slab C30/37  550 mm | 440.00 | | N/A | 32.25 | | N/A |
| Story slab C30/37  200 + 75 mm* | 87.96 | | N/A | 9.91 | | N/A |
| Beam C30/37 | N/A | | N/A | N/A | | N/A |
| Columns C50/60 | 29.89 | | N/A | 2.96 | | N/A |
| Foundation slab C50/60  500 mm | 400.00 | | N/A | 36.68 | | N/A |
| Story slab C50/60  200 + 75 mm* | 87.97 | | N/A | 9.80 | | N/A |
| Beam C50/60 | N/A | | N/A | N/A | | N/A |
| Columns C50/60 | 29.89 | | N/A | 2.96 | | N/A |
| Foundation slab C50/60  500 mm | 400.00 | | N/A | 36.68 | | N/A |
| Story slab C50/60  200 + 75 mm* | 87.97 | | N/A | 9.80 | | N/A |
| Beam C50/60 | N/A | | N/A | N/A | | N/A |
| Columns C70/85 | 22.77 | | N/A | 2.26 | | N/A |
| Foundation slab C70/85  500 mm | 400.00 | | N/A | 39.23 | | N/A |
| Story slab C70/85  200 + 75 mm* | 88.01 | | N/A | 9.45 | | N/A |
| Beam C70/85 | N/A | | N/A | N/A | | N/A |
| Columns C70/85 | 22.77 | | N/A | 2.26 | | N/A |
| System: Waffle slab | | Span: 7.0 m × 7.5 m | | | Number of stories: 10 | |
| Structural element | Concrete volume [m3] | | Reinforcement YLM [t] | Reinforcement optimized LEFEA [t] | | Reinforcement unoptimized LEFEA [t] |
| Foundation slab C30/37  700 mm | 560.00 | | N/A | 44.96 | | N/A |
| Story slab C30/37  200 + 75 mm* | 87.96 | | N/A | 9.91 | | N/A |
| Beam C30/37 | N/A | | N/A | N/A | | N/A |
| Columns C30/37 | 91.33 | | N/A | 9.05 | | N/A |
| Foundation slab C30/37  700 mm | 560.00 | | N/A | 44.96 | | N/A |
| Story slab C30/37  200 + 75 mm* | 87.96 | | N/A | 9.91 | | N/A |
| Beam C30/37 | N/A | | N/A | N/A | | N/A |
| Columns C50/60 | 63.75 | | N/A | 6.32 | | N/A |
| Foundation slab C50/60  650 mm | 520.00 | | N/A | 51.80 | | N/A |
| Story slab C50/60  200 + 75 mm* | 87.97 | | N/A | 9.80 | | N/A |
| Beam C50/60 | N/A | | N/A | N/A | | N/A |
| Columns C50/60 | 63.75 | | N/A | 6.32 | | N/A |
| Foundation slab C50/60  650 mm | 520.00 | | N/A | 51.80 | | N/A |
| Story slab C50/60  200 + 75 mm* | 87.97 | | N/A | 9.80 | | N/A |
| Beam C50/60 | N/A | | N/A | N/A | | N/A |
| Columns C70/85 | 52.94 | | N/A | 5.25 | | N/A |
| Foundation slab C70/85  600 mm | 480.00 | | N/A | 52.10 | | N/A |
| Story slab C70/85  200 + 75 mm* | 88.01 | | N/A | 9.45 | | N/A |
| Beam C70/85 | N/A | | N/A | N/A | | N/A |
| Columns C70/85 | 52.94 | | N/A | 5.25 | | N/A |

*In the case of waffle slabs the first number corresponds to the height of ribs, and the second one to the height of the slab itself

N.B: The quantities for slabs and beams are provided for one storey only.
